# Supplementary material for: Reactivity and stabilization mechanisms of AlH3 crystals coated with polyvinylidene difluoride
Source: Royal Society of Chemistry journal article supplement (doi:10.1039/d4ce00702f), 2024-01-01
Supplement: d4ce00702f1.pdf [file d4ce00702f1.pdf]

## Supporting information

### Reactivity and stabilization mechanisms of $\text{AlH}_3$ crystals by coating of polyvinylidene difluoride

Yiran Zhang, Haorui Zhang, Minghui Yu, Qi-Long Yan\*

National Key Laboratory of Solid Rocket Propulsion, Northwestern Polytechnical University, Xi'an 710072, China

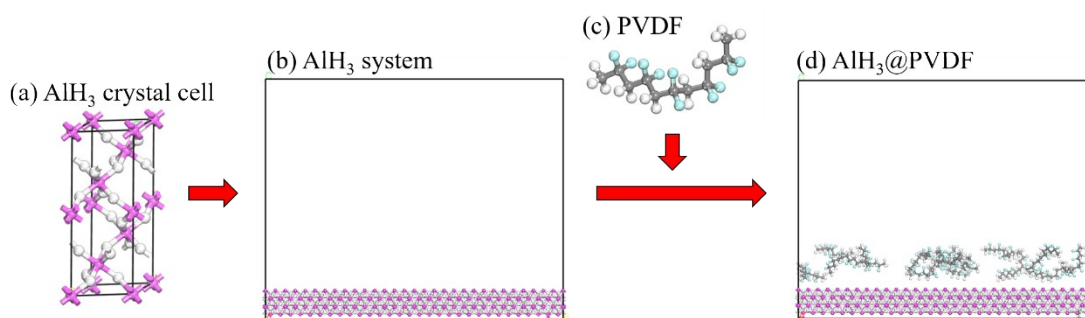

Figs. S1. Detailed building process of  $\text{AlH}_3@PVDF$

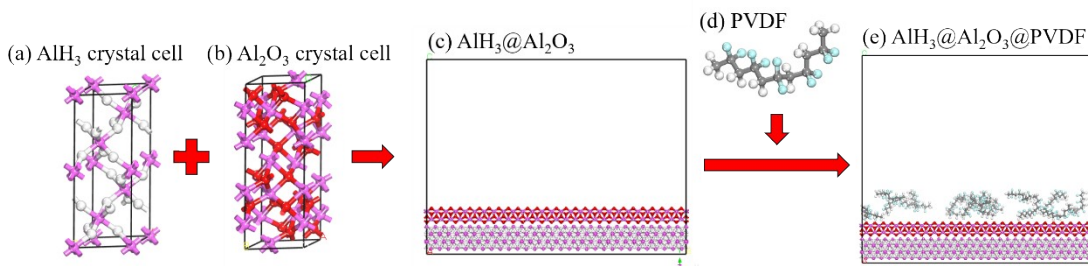

Figs. S2. Detailed building process of  $\text{AlH}_3@Al_2O_3@PVDF$

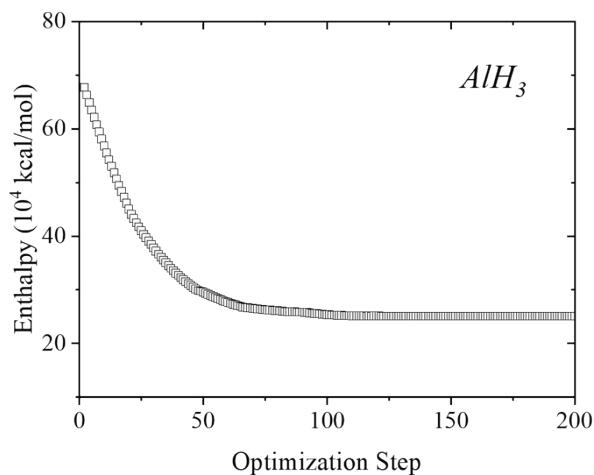

Figs. S3. Energy change of the  $\text{AlH}_3$  system during relaxation

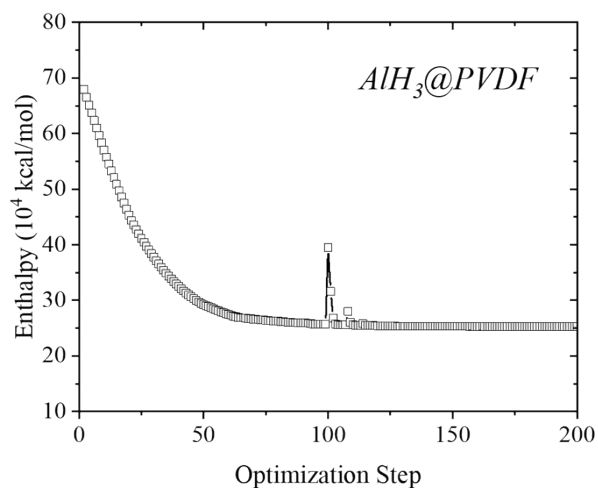

Figs. S4. Energy change of the  $\text{AlH}_3@PVDF$  system during relaxation

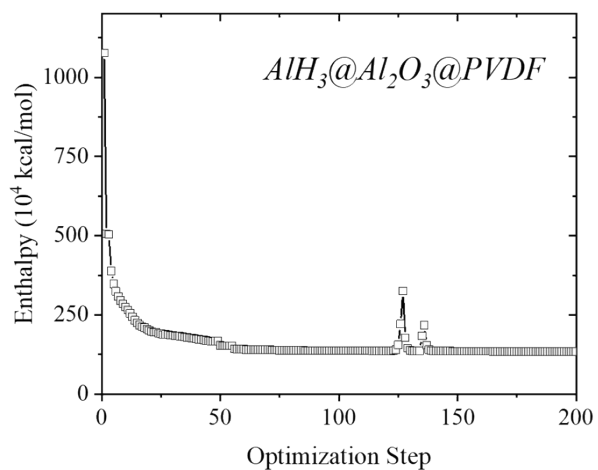

Figs. S5. Energy change of the  $\text{AlH}_3@Al_2O_3@PVDF$  system during relaxation

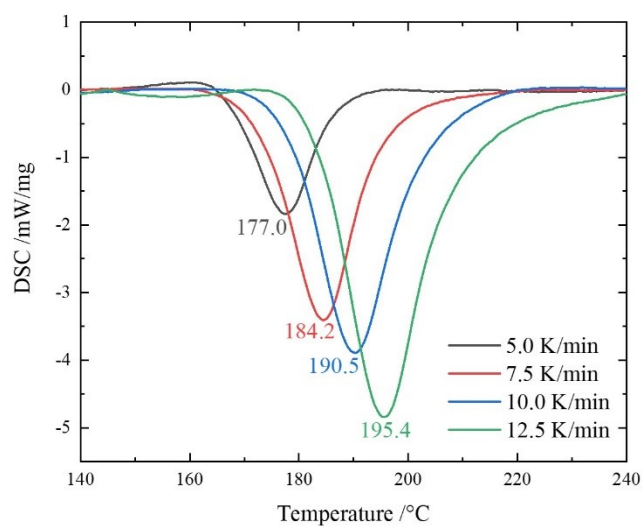

Figs. S6. DSC curves of  $\text{AlH}_3$

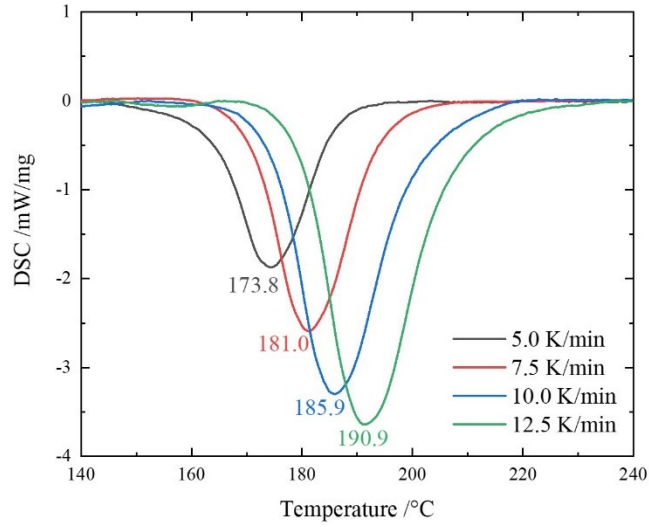

Figs. S7. DSC curves of AF-08

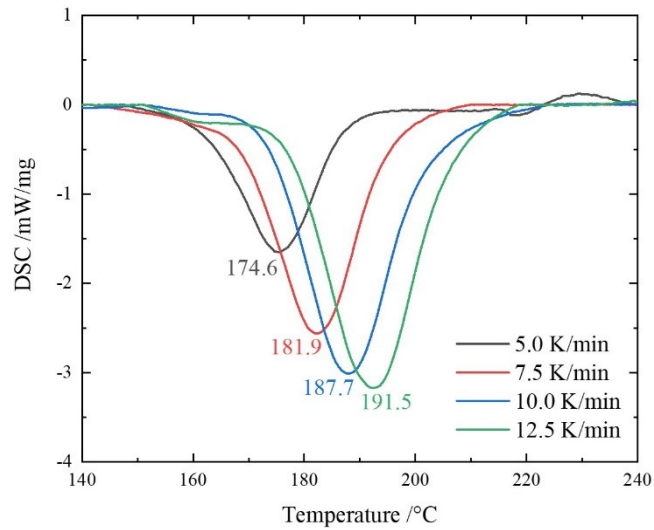

Figs. S8. DSC curves of AF-15

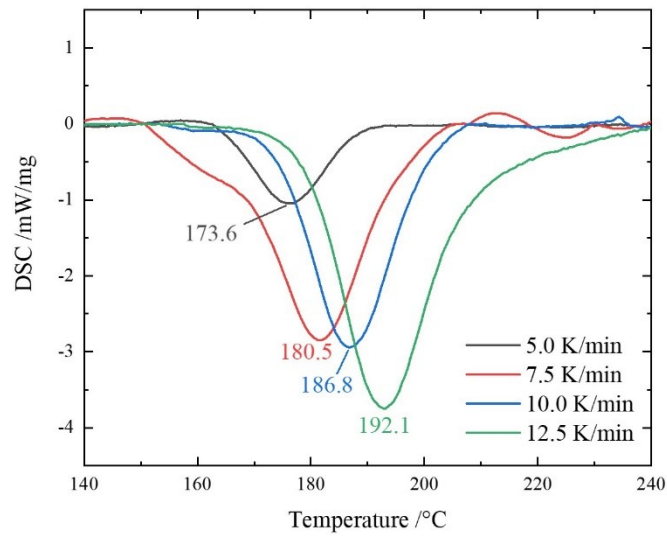

Figs. S9. DSC curves of AF-20

Table S1. Detailed DSC data for AlH<sub>3</sub> and composites.

| Samples          | <i>R</i> | <i>T<sub>i</sub></i> | <i>T<sub>p</sub></i> | $\Delta H$ |
|------------------|----------|----------------------|----------------------|------------|
| AlH <sub>3</sub> | 5.0      | 167.8                | 177.0                | 313.7      |
|                  | 7.5      | 173.5                | 184.2                | 393.8      |
|                  | 10.0     | 179.1                | 190.5                | 370.8      |
|                  | 12.5     | 183.9                | 195.4                | 301.5      |
| AF-08            | 5.0      | 165.3                | 173.8                | 313.1      |
|                  | 7.5      | 171.3                | 181.0                | 322.9      |
|                  | 10.0     | 176.2                | 185.9                | 312.6      |
|                  | 12.5     | 180.1                | 190.9                | 285.0      |
| AF-15            | 5.0      | 163.6                | 174.6                | 298.3      |
|                  | 7.5      | 169.5                | 181.9                | 318.8      |
|                  | 10.0     | 174.1                | 187.7                | 296.2      |
|                  | 12.5     | 178.1                | 191.5                | 244.5      |
| AF-20            | 5.0      | 167.2                | 173.6                | 191.0      |
|                  | 7.5      | 180.5                | 180.5                | 278.2      |
|                  | 10.0     | 176.1                | 186.8                | 275.4      |
|                  | 12.5     | 179.5                | 192.1                | 256.9      |

Notes: *R*, the heating rate, in °C min<sup>-1</sup>; *T<sub>i</sub>*, the onset temperature, in °C; *T<sub>p</sub>*, the peak temperature, in °C;  $\Delta H$ , heat absorption, in J g<sup>-1</sup>.
